# Supplementary material
Source: HighWire-hosted journal article supplement (https://ard.bmj.com/content/78/7/979)
Supplement: inline-supplementary-material-1 [file inline-supplementary-material-1.docx]

**SUPLEMENTARY MATERIAL**

**Appendix: 2**

**Appendix 1**

**Collaborators of the EUSTAR centres in numerical order (of the centers)**

Serena Guiducci, Department of Medicine, Section of Rheumatology, University of Florence, Italy; Ulrich A. Walker, Diego Kyburz, Department of Rheumatology, Basel University, Unispital Basel, Basel, Switzerland; Giovanni Lapadula, Rheumatology Unit-DiMIMP, School of Medicine University of Bari, Italy; Britta Maurer, Suzana Jordan, Rucsandra Dobrota, Division of Rheumatology, University Hospital Zurich, Zurich, Switzerland; Radim Becvar, Institute of Rheumatology, 1st Medical School, Charles University Na Slupi 4, Praha 2 CZ-12850 Praha, Czech Republic; Stanislaw Sierakowsky, Otylia Kowal Bielecka, Department of Rheumatology and Internal Medicine, Medical University of Bialystok, Bialystok, Poland; Alberto Sulli, Maurizio Cutolo, Research Laboratory and Division of Rheumatology, Department of Internal Medicine, University of Genova, Italy; Giovanna Cuomo, Department of Clinical and Experimental Medicine ‘F-Magrassi’ II Policlinico, Unit of Rheumatology, Naples, Italy; Ileana Nicoara, Department of Rheumatology, University of Medicine and Pharmacy ‘Iuliu Hatieganu’ Cluj, Cluj-Napoca, Romania; André Kahan, Department of Rheumatology, University Paris Descartes and Cochin Hospital, Paris, France; Panayiotis G. Vlachoyiannopoulos, Department of Pathopysiology, Medical School, National University of Athens, Greece; Carlo Maurizio Montecucco, Roberto Caporali, Unita’ Operativa e Cattedra di Reumatologia, IRCCS Policlinico S Matteo, Pavia, Italy; Jiri Stork, Department of Dermatology the 1st faculty of Medicine, Charles University, Prague U nemocnice 2, 12800 Praha 2 , Czech Republic; Murat Inanc, Istanbul Medical Faculty, Department of Internal Medicine, Division of Rheumatology, Istanbul, Turkey; Patricia E. Carreira, Servicio de Reumatologia, Hospital Universitario 12 de Octubre, Madrid, Spain; Srdan Novak, Department of Rheumatology and Clinical Immunology, Internal Medicine, KBC Rijeka, Croatia; László Czirják, Cecilia Varju, Department of Immunology and Rheumatology, Faculty of Medicine, University of Pécs, Hungary; Eugene J. Kucharz, Anna Kotulska, Magdalena Kopec-Medrek, Malgorzata Widuchowska, Department of Internal Medicine and Rheumatology, Medical University of Silesia, Katowice, Poland; Franco Cozzi, Rheumatology Unit, Department of Clinical and Experimental Medicine University of Padova Via Giustiniani, 2 I-35128 Padova, Italy; Blaz Rozman, University Medical Center Ljublijana, Division of Internal Medicine, Department of Rheumatology, Ljubliana, Slovenia; Carmel Mallia, Bernard Coleiro, ‘Stella Maris’, Balzan, Malta; Armando Gabrielli, Istituto di Clinica Medica Generale, Ematologia ed Immunologia Clinica, Università Politecnica delle Marche Polo Didattico University of Ancona Via Tronto, 10 I-60020 Ancona, Italy; Dominique Farge, Chen Wu, Zora Marjanovic, Helene Faivre, Darin Hij, Roza Dhamadi, Department of Internal Medicine, Hospital Saint-Louis, Paris, France; Frank Wollheim, Agneta Scheja, Dirk M Wuttge, Kristofer Andréasson, Department of Rheumatology, Lund University, Lund, Sweden; Duska Martinovic, Department of Internal Medicine, Clinical Hospital of Split, Croatia; Alexandra Balbir-Gurman, B. Shine Rheumatology Unit Rambam Health Care Campus, Rappaport Faculty of Medicine, Technion, Haifa, Israel; F. Trotta, Andrea Lo Monaco, Department of Clinical and Experimental Medicine, Rheumatology Unit, University of Ferrara, Italy; Raffaele Pellerito, Ospedale Mauriziano, Centro di Reumatologia, Torino, Italy; Paola Caramaschi, Università degli Studi di Verona Dipartimento di Medicina Clinica e Sperimentale Reumatologia-Medicina Interna B Policlinico GB Rossi Piazzale Scuro 10, 37134 Verona, Italy; Jadranka Morovic-Vergles, Division of Clinical Immunology and Rheumatology, Department of Internal Medicine, Dubrava University Hospital, Zagreb, Croatia; Carol Black, Christopher Denton, Centre for Rheumatology, Royal Free and University College London Medical School, Royal Free Campus, United Kingdom; Nemanja Damjanov, Institute of Rheumatology Belgrade Resavska 69 11000 Belgrade, Serbia & Montenegro; Jörg Henes, Medizinische Universitätsklinik Abt. II (Onkologie, Hämatologie, Rheumatologie Immunologie, Pulmonologie) Otfried-Müller-Strasse 10 D-72076 Tübingen, Germany; Vera Ortiz Santamaria, Rheumatology Granollers General Hospital Avgda Francesc Ribas s/n 08400 Granollers, Barcelona, Spain; Stefan Heitmann, Department of Rheumatology, Marienhospital Stuttgart Böheimstrasse 37 D-70199 Stuttgart, Germany; Dorota Krasowska, Department of Dermatology, Medical University of Lublin, Poland; Matthias Seidel, Medizinische Universitäts-Poliklinik Dep. of Rheumatology Wilhelmstr. 35-37 D-53111 Bonn, Germany; Paul Hasler, Kantonsspital Aarau, Rheumaklinik und Institut für Physikalische Medizin und Rehabilitation Kantonsspital Aarau Tellstrasse, Aarau, Switzerland; Harald Burkhardt, Andrea Himsel, Klinikum der Johann Wolfgang Goethe Universität, Medizinische Klinik III, Rheumatologische Ambulanz, Frankfurt am Main, Germany; Gianluigi Bajocchi, Arcispedale Santa Maria Nuova Dipartimento Area Medica I, U.O. di Reumatologia, Reggio Emilia, Italy; José Antonio Pereira Da Silva, Maria João Salvador, Rheumatology Department, Hospitais da Universidade, Coimbra, Portugal; Bojana Stamenkovic, Aleksandra Stankovic, Institute for Prevention, Treatment and Rehabilitation of Rheumatic and Cardiovascular Diseases, Niska Banja, Serbia and Montenegro; Carlo Francesco Selmi, Maria De Santis, Division of Rheumatology and Clinical Immunology, Humanitas Clinical and Research Center and BIOMETRA Department, University of Milan, Italy; Mohammed Tikly, Rheumatology Unit, Department of Medicine Chris Hani Baragwanath Hospital and University of the Witwatersrand P.O. Bertsham 2013, Johannesburg, South Africa; Lev N. Denisov, Institute of Rheumatology, Russian Academy of Medical Science, Moscow, Russia; Ariane Herrick, Hope/Hospital University of Manchester Rheumatic Diseases Centre, Clinical Sciences, Building, Scott Lane, Salford, United Kingdom; Ulf Müller-Ladner, Marc Frerix, Ingo Tarner, Justus-Liebig University Giessen, Department of Rheumatology and Clinical Immunology, Kerckhoff-Klinik Bad Nauheim, Germany; Raffaella Scorza, U.O. Immunologia Clinica, Centro di Riferimento per le Malattie Autoimmuni Sistemiche, Milano, Italy; Francesco Puppo, Clinica di Medicina Interna ad orientamento immunologico-Università di Genova, Genova, Italy; Merete Engelhart, Gitte Strauss, Henrik Nielsen, Kirsten Damgaard, Department of Rheumatology, University Hospital of Gentofte, Hellerup, Denmark; Gabriela Szücs, Szilvia Szamosi Department of Internal Medicine, Division of Rheumatology, University of Debrecen, Faculty of Medicine; Antonio Zea Mendoza, Carlos de la Puente, Sifuentes Giraldo WA, Servicio de Reumatología, Hospital Ramon Y Cajal, Madrid, Spain; Øyvind Midtvedt, Silje Reiseter, Torhild Garen, Department of Rheumatology, Rikshospitalet University Hospital, Oslo, Norway; David Launay, Department of Internal Medicine, Hôpital Claude Huriez, Lille cedex, France; Guido Valesini, Department of Internal Medicine and Medical Specialities, ‘Sapienza’ University of Rome, Italy; Ruxandra Maria Ionescu, Laura Groseanu, Daniela Opris, Department of Rheumatology, St. Mary Hospital, Carol Davila, University of Medicine and Pharmacy, Bucharest, Romania; Roxana Sfrent Cornateanu, Razvan Ionitescu, Ana Maria Gherghe, Alina Soare, Marilena Gorga, Mihai Bojinca, Mihaela Milicescu, Department of Internal Medicine and Rheumatology, Cantacuzino Hospital, Carol Davila University of Medicine and Pharmacy, Bucharest, Romania; Cord Sunderkötter, Annegret Kuhn, Department of Dermatology, University of Münster Von-Esmarch-Str. 58, Münster, Germany; Nora Sandorfi, Thomas Jefferson University, Philadelphia, USA; Georg Schett, Christian Beyer, Department of Internal Medicine 3, University Hospital Erlangen, Germany; Pierluigi Meroni, Francesca Ingegnoli, Division of Rheumatology, Istituto Gaetano Pini, Department of Clinical Sciences and Community Health, University of Milano, Milano, Italy; Luc Mouthon, Department of Internal Medicine of Pr Loïc Guillevin Hôpital Cochin 27 rue du Faubourg Saint-Jacques 75014 Paris, France; Filip De Keyser, Karin Melsens, University of Ghent, Department of Rheumatology and department of internal medicine, Gent, Belgium; Francesco P. Cantatore, Ada Corrado, U.O. Reumatologia-Università degli Studi di Foggia, Ospedale ‘Col. D’Avanzo’, Foggia, Italy; Line Iversen, University Hospital of Copenhagen, Department of Dermatology D-40 HS-Bispebjerg Hospital, Copenhagen, Denmark; Carlos Alberto von Mühlen, Jussara Marilu Bohn, Lilian Scussel Lonzetti, Rheuma Clinic, Porto Alegre, Brazil; Kilian Eyerich, Rüdiger Hein, Elisabeth Knott, Department of Dermatology and Allergy of the TU Munich, Germany; Piotr Wiland, Magdalena Szmyrka-Kaczmarek, Renata Sokolik, Ewa Morgiel, Marta Madej, Department of Rheumatology and Internal Diseases, Wroclaw University of Medicine, Wroclaw, Poland; Frédéric A. Houssiau, Université Catholique de Louvain, Cliniques Universitaires St-Luc, Bruxelles, Belgium; Brigitte Krummel-Lorenz, Petra Saar, Endokrinologikum Frankfurt, Germany; Martin Aringer, Claudia Günther, Division of Rheumatology, Department of Medicine III/Department of Dermatology, University Medical Center Carl Gustav Carus, Technical University of Dresden, Germany; Rene Westhovens, Jan Lenaerts, Catholic University of Leuven, Department of Rheumatology, Leuven, Belgium; Branimir Anic, Marko Baresic, Miroslav Mayer, University Hospital Centre Zagreb, Division of Clinical Immunology and Rheumatology, Department of Medicine, Zagreb, Croatia; Maria Üprus, Kati Otsa, East-Tallin Central Hospital, Department of Rheumatology, Tallin, Estonia; Brigitte Granel, Service de Médecine Interne, Hôpital Nord de Marseille, Marseille, France; Carolina de Souza Müller, Sebastião C. Radominski, Valderílio F. Azevedo, Hospital de Clínicas da Universidade Federal do Paraná, Curitiba – Paraná, Brasil; Sergio Jimenez, Joanna Busquets, Scleroderma Center, Thomas Jefferson University, Philadelphia, USA; Svetlana Agachi, Liliana Groppa, Lealea Chiaburu, Eugen Russu, Sergei Popa, Municipal Centres of Research in Scleroderma, Hospital ‘Sacred Trinity’, Department of Rheumatology/Department of Rheumatology, Republican Clinical Hospital, Chisinau, Republic of Moldova; Thierry Zenone, Department of Medicine, Unit of Internal Medicine 179 Boulevard Marechal Juin 26953 Valence cedex 9, France; Margarita Pileckyte, Kaunas University of Medicine Hospital Department of Rheumatology, Lithuania; Alessandro Mathieu, Alessandra Vacca, II Chair of Rheumatology, University of Cagliari-Policlinico Universitario S.S. 554 bivio per Sestu, Monserrato (CA), Italy; Percival D. Sampaio-Barros, Natalino H. Yoshinari, Roberta G. Marangoni, Patrícia Martin, Luiza Fuocco, University of São Paulo-Rheumatology Division, Faculdade de Medicina de Universidade de São Paulo, São Paulo SP, Brasil; Simon Stebbings, John Highton, Dunedin School of Medicine, Dunedin, New Zealand; Peter Chapman, John O’Donnell, Lisa Stamp, Department of Medicine, University of Otago, Christchurch, New Zealand; Alan Doube, Kamal Solanki, Waikato University Hospital, Rheumatology Unit, Hamilton City, New Zealand; Douglas Veale, Marie O’Rourke, Department of Rheumatology, Bone and Joint Unit, St. Vincent’s University Hospital, Dublin, Ireland; Esthela Loyo, Reumatologia e Inmunologia Clinica Hospital Regional Universitario Jose Ma Cabral y Baez Clinica Corominas Restauracion 57 cuarta planta Santiago, Dominican Republic; Mengtao Li, Department of Rheumatology, Peking Union Medical College Hospital (West Campus), Chinese Academy of Medical Sciences, Beijing, China; Walid Ahmed Abdel Atty Mohamed, Alexandria University – Unit of Rheumatology, Alexandria, Egypt; Antonio Amoroso, Antonietta Gigante, Centro per la Sclerosi Sistemica – Dipartimento di Medicina Clinica, Università La Sapienza, Policlinico Umberto I, Roma, Italy; Fahrettin Oksel, Figen Yargucu, Ege University, Faculty of Medicine, Dept. of Internal Medicine, Division of Rheumatology, Ege Universitesi Fakültesi Hastanesi 304, Izmir, Turkey; Cristina-Mihaela Tanaseanu, Monica Popescu, Alina Dumitrascu, Isabela Tiglea, Clinical Emergency Hospital St. Pantelimon, Bucharest, Romania; Rosario Foti, U.O. di Reumatologia, A.O.U. Policlinico Vittorio Emanuele, Catania, Italy; Rodica Chirieac, Division of Rheumatology and Rehabilitation GR.T.Popa, Center for Biomedical Research, European Center for Translational Research, “GR.T.Popa” University of Medicine and Pharmacy, Rehabilitation Hospital, Iasi, Romania; Daniel Furst, Division of Rheumatology, Department of Medicine, University of California at Los Angeles, Rehab Center, Los Angeles, USA; Peter Villiger, Sabine Adler, Department of Rheumatology and Clinical Immunology/Allergology, Inselspital, University of Bern, Switzerland; Jacob van Laar, James Cook University Hospital Marton Road Middlesbrough TS4 3BW; Cristiane Kayser, Andrade Luis Eduardo C., Universidade Federal de São Paulo – Disciplina de Reumatologia, São Paulo, Brasil; Nihal Fathi, Manal Hassanien, Assiut and Sohage University Hospital Rheumatology Department Assiut University Hospital, Egypt; Paloma García de la Peña Lefebvre, Silvia Rodriguez Rubio, Marta Valero Exposito, Hospital Universitario Madrid Norte Sanchinarro, Madrid, Spain; Emmanuel Chatelus, Jean Sibilia, Jacques Eric Gottenberg, Hélène Chifflot, University Hospital of Strasbourg, Department of Rheumatology, Hôpital de Hautepierre, Service de Rhumatologie, Strasbourg Cedex, France; Ira Litinsky, Department of Rheumatology Tel-Aviv Sourasky Medical Center, Tel-Aviv, Israel; Paul Emery, Maya Buch, Francesco Del Galdo, Scleroderma Programme, Institute of Molecular Medicine, Division of Musculoskeletal Diseases, University of Leeds, Chapel Allerton Hospital, Leeds, United Kingdom; Algirdas Venalis, Irena Butrimiene, Paulius Venalis, Rita Rugiene, Diana Karpec, State Research Institute for Innovative Medicine, Vilnius University, Vilnius, Lithuania; Joseph A. Lasky, Tulane University Lung Center, Tulane/University Medical Center Scleroderma and Sarcoidosis Patient Care and Research Center, New Orleans, USA; Vanesa Cosentino, Eduardo Kerzberg, Fabiana Montoya, Osteoarticular Diseases and Osteoporosis Centre, Pharmacology and Clinical Pharmacological Research Centre, School of medicine, University of Buenos Aires, Rheumatology and Collagenopathies Department, Ramos Mejía Hospital, Buenos Aires, Argentina; Washington Bianchi, Sueli Carneiro, Giselle Baptista Maretti, Dante Valdetaro Bianchi, Department of Rheumatology-Santa Casa da Misericórdia do Rio de Janeiro, Rio de Janeiro, Brasil; Massimiliano Limonta, Antonio Luca Brucato, Elide Lupi, USSD Reumatologia, Ospetali Riuniti di Bergamo, Italy; Itzhak Rosner, Michael Rozenbaum, Gleb Slobodin, Nina Boulman, Doron Rimar, Rheumatology Unit Bnai Zion Medical Center, Haifa, Israel; Maura Couto, Unidade de Reumatologia de Viseu Centro Hospitalar Tondela-Viseu (Unidade de Reumatologia), Viseu, Portugal; Sarah Kahl, Universitätsklinikum Schleswig-Holstein, Campus Lübeck Innere Medizin/Rheumatologie/Immunologie Rheumaklinik Bad Bramstedt, Bad Bramstedt, Germany; Fei Chen, Deborah McCloskey, Halina Malveaux, UMDNJ- Scleroderma Program Clinical Research Center – Robert Wood Johnson Medical School Acute Care Building, New Brunswick NJ 08903, USA; François Spertini, Camillo Ribi, Guillaume Buss, Department of Rheumatology, Clinical Immunology and Allergy, Lausanne, Switzerland; Thierry Martin, Aurélien Guffroy, Vincent Poindron, Clinical Immunology and Internal Medicine, National Referral Center for Systemic Autoimmune Diseases, Strasbourg, France; Fatima Chotchaeva, Nikolay A. Mukhin, Sergey Moiseev, Sechenov First Moscow State Medical University, Clinic of Nephrology, Internal and Occupational Diseases. Moscow 119992, Russia.

**Appendix II**

STROBE Statement—Checklist of items that should be included in reports of ***cohort studies***

|  | **Item No** | **Recommendation** |
| --- | --- | --- |
| **Title and abstract** | 1 | (*a*) Indicate the study’s design with a commonly used term in the title or the abstract |
| **Study design is indicated in the title and in the abstract page 4 (method section).** |
| (*b*) Provide in the abstract an informative and balanced summary of what was done and what was found  **This was done pages 4-5.** |
| **Introduction** | | |
| Background/rationale | 2 | Explain the scientific background and rationale for the investigation being reported  **The scientific background is clearly explained page 6** |
| Objectives | 3 | State specific objectives, including any prespecified hypotheses  **They were stated page 6.** |
| **Methods** | | |
| Study design | 4 | Present key elements of study design early in the paper  **They are presented in the method section page 7.** |
| Setting | 5 | Describe the setting, locations, and relevant dates, including periods of recruitment, exposure, follow-up, and data collection  **They are clearly described in the method section pages 7 and 8.** |
| Participants | 6 | (*a*) Give the eligibility criteria, and the sources and methods of selection of participants. Describe methods of follow-up  **This is described in the method section pages 7 and 8.** |
| (*b*)For matched studies, give matching criteria and number of exposed and unexposed  **They are presented page 9 (covariates) and the numbers of exposed/unexposed patients are detailed page 7.** |
| Variables | 7 | Clearly define all outcomes, exposures, predictors, potential confounders, and effect modifiers. Give diagnostic criteria, if applicable  **They are defined in the method section pages 8-10.** |
| Data sources/ measurement | 8* | For each variable of interest, give sources of data and details of methods of assessment (measurement). Describe comparability of assessment methods if there is more than one group  **They are defined in the method section pages 8.** |
| Bias | 9 | Describe any efforts to address potential sources of bias  **They are detailed in the statistical analysis pages 9-10.** |
| Study size | 10 | Explain how the study size was arrived at  **This is explained in the method section.** |
| Quantitative variables | 11 | Explain how quantitative variables were handled in the analyses. If applicable, describe which groupings were chosen and why  **This is explained in the statistical analysis page 9.** |
| Statistical methods | 12 | (*a*) Describe all statistical methods, including those used to control for confounding |
| **They are detailed in the statistical analysis pages 9-10.** |
| (*b*) Describe any methods used to examine subgroups and interactions  **They were described page 10.** |
| (*c*) Explain how missing data were addressed  **We used imputations to minimize the possible role of missing values. This is explained in the method section pages 8-9.** |
| (*d*) If applicable, explain how loss to follow-up was addressed  **NA** |
| (*e*) Describe any sensitivity analyses  **Sensitivity analyses were described page 10.** |
| **Results** | | |
| Participants | 13* | (a) Report numbers of individuals at each stage of study—eg numbers potentially eligible, examined for eligibility, confirmed eligible, included in the study, completing follow-up, and analysed  **This is reported page 11** |
| (b) Give reasons for non-participation at each stage  **They were reported in the results section** |
| (c) Consider use of a flow diagram  **Flow diagram is presented in Appendix Figure 1** |
| Descriptive data | 14* | (a) Give characteristics of study participants (eg demographic, clinical, social) and information on exposures and potential confounders  **This is reported page 11, Table I, Table IV, and in Appendix Tables II and III.** |
| (b) Indicate number of participants with missing data for each variable of interest  **This is reported in Appendix Table 1.** |
| (c) Summarise follow-up time (eg, average and total amount)  **This is reported in Table I.** |
| Outcome data | 15* | Report numbers of outcome events or summary measures over time  **This is reported pages 12-14 (number of events per 100 person-years).** |
| Main results | 16 | (*a*) Give unadjusted estimates and, if applicable, confounder-adjusted estimates and their precision (eg, 95% confidence interval). Make clear which confounders were adjusted for and why they were included  **This is reported in Figures 1 and 2 and Appendix Figure 2.** |
| (*b*) Report category boundaries when continuous variables were categorized  **This is reported** |
| (*c*) If relevant, consider translating estimates of relative risk into absolute risk for a meaningful time period  **NA** |
| Other analyses | 17 | Report other analyses done—eg analyses of subgroups and interactions, and sensitivity analyses  **They are reported in the results section and in Figure 2, Appendix Figures 3 and 4 and in Appendix Table IV.** |
| **Discussion** | | |
| Key results | 18 | Summarise key results with reference to study objectives  **Key results were summarized in the discussion section** |
| Limitations | 19 | Discuss limitations of the study, taking into account sources of potential bias or imprecision. Discuss both direction and magnitude of any potential bias  **Limitations of the study were discussed in the discussion section page 17.** |
| Interpretation | 20 | Give a cautious overall interpretation of results considering objectives, limitations, multiplicity of analyses, results from similar studies, and other relevant evidence  **This was performed in the discussion section** |
| Generalisability | 21 | Discuss the generalisability (external validity) of the study results  **This was discussed in our discussion.** |
| **Other information** | | |
| Funding | 22 | Give the source of funding and the role of the funders for the present study and, if applicable, for the original study on which the present article is based  **The funding source and its role were described page 10.** |

*Give information separately for exposed and unexposed groups.

**Note:** An Explanation and Elaboration article discusses each checklist item and gives methodological background and published examples of transparent reporting. The STROBE checklist is best used in conjunction with this article (freely available on the Web sites of PLoS Medicine at http://www.plosmedicine.org/, Annals of Internal Medicine at http://www.annals.org/, and Epidemiology at http://www.epidem.com/). Information on the STROBE Initiative is available at http://www.strobe-statement.org.

**Supplementary TABLE I: Number of missing data for each characteristic of SSc-patients treated with rituximab and untreated SSc-controls from EUSTAR database**

|  | Total N=9829 | Non treated n=9575 | Treated n=254 |
| --- | --- | --- | --- |
| Sex | 0 (0%) | 0 (0%) | 0 (0%) |
| Age | 0 (0%) | 0 (0%) | 0 (0%) |
| ANA | 256 (2.6%) | 247 (2.6%) | 9 (3.5%) |
| Anti-Scl70 | 614 (6.2%) | 604 (6.3%) | 10 (3.9%) |
| ACA | 634 (6.5%) | 624 (6.5%) | 10 (3.9%) |
| RNA pol III antibodies | 6800 (69.2%) | 6790 (70.9%) | 10 (3.9%) |
| Cutaneous form | 96 (1%) | 86 (0.9%) | 10 (3.9%) |
| Disease duration (years) | 1144 (11.6%) | 1144 (11.9%) | 0 (0%) |
| Previous IS or biologics | 0 (0%) | 0 (0%) | 0 (0%) |
| Modified Rodnan skin score | 991 (10.1%) | 958 (10%) | 33 (13%) |
| FVC | 5142 (52.3%) | 5105 (53.3%) | 37 (14.6%) |
| DLCO | 2922 (29.7%) | 2887 (30.2%) | 35 (13.8%) |
| Prednisone | 4608 (46.9%) | 4608 (48.1%) | 0 (0%) |
| Lung fibrosis | 5944 (60.5%) | 5944 (62.1%) | 0 (0%) |
| Follow-up (months) | 7 (0.1%) | 0 (0%) | 7 (2.8%) |

SSc: systemic sclerosis. Values are median [interquartile range] or mean ± SD or numbers (%) of observations. ANA: antinuclear antibodies; ACA: anticentromeres; RNA pol III: RNA polymerases III antibodies; lung fibrosis was diagnosed on HRCT (high-resolution computed tomography); CT: computed tomography, FVC: forced vital capacity; DLCO: diffusing capacity of lung for carbon monoxide. Previous IS (immunosuppressive drugs) include Methotrexate, Mycophenolate Mofetil, Azathioprin and Cyclophosphamide, whereas biologics include anti-TNF alpha, Tocilizumab and Abatacept.

**Supplementary TABLE II: Other characteristics of SSc-patients treated with rituximab.**

|  | N=254 |
| --- | --- |
| Rheumatoid factor | 48/233 (21%) |
| Anti-CCP antibodies | 22/210 (10.7%) |
| Other antibodies | 36/244 (14.7%) |
| Overlap syndrome | 62/243 (25.5%) |
| Overlap with rheumatoid arthritis | 23/243 (9.5%) |
| Overlap with myositis | 19/243 (7.8%) |
| Overlap with Sjögren syndrome | 16/243 (6.6%) |
| Digital ulcers | 51/245 (20.8%) |
| Upper gastrointestinal symptoms | 144/239 (60.2%) |
| Lower gastrointestinal symptoms | 52/240 (21.7%) |

SSc: systemic sclerosis. Values are median ± interquartile range or numbers (%) of observations/number of available data. Other antibodies include anti-SSA (n=14), anti-RNP (n=9), anti-PM-Scl (n=9), anti-SSB (n=5), anti-fibrillarine (n=3), anti-Sm (n=2), anti-ds DNA (n=2), anti-mitochondrial antibodies (n=1), anti-SRP (n=1) and anticardiolipin antibodies (n=1). Other overlapping diseases were as follow: antisynthetases syndrome (n=1), primary biliary cirrhosis (n=1), vasculitis (n=5), mixed connective tissue disease (n=3) and systemic lupus erythematosus (n=5).

**Supplementary TABLE III: Side effects during treatment with rituximab**

| Minor side effects * 43 (17%)   - Infections 27 (10.6%) - Upper respiratory tract 7 (2.8%) - Lower respiratory tract 9 (3.5%) - Cutaneous 7 (2.8%) - Urinary 1 (0.4%) - Gastrointestinal 1 (0.4%) - Osteomyelitis 2 (0.8%) - Hypogammaglobulinemia 23 (9.1%) - Cardiovascular 8 (3.1%) - Arrhythmia 3 (1.2%) - Arterial hypertension 2 (0.8%) - Retrosternal pain** 1 (0.4%) - Atherosclerosis 1 (0.4%)   (stenosis of the carotid artery)   - Congestive diastolic dysfunction 1 (0.4%) - Cutaneous eruption 5 (2.0%) - Dyspnea 1 (0.4%) - Itching 2 (0.8%) - Transient leukopenia 4 (1.6%) - Anemia 2 (0.8%) - Vasculitic skin lesions 1 (0.4%) - Fasciculation 1 (0.4%) - Asthenia 1 (0.4%) - Articular pain 1 (0.4%) |
| --- |
| Severe side effects* 36 (14.2%)   - Severe infections*** 16 (3.5%) - Respiratory 6 (2.4%) - Cutaneous 6 (2.4%) - Gastrointestinal 2 (0.8%) - Osteoarticular 2 (0.8%) - Respiratory 5 (2.0%) - Dyspnea 3 (1.2%) - PAH 1 (0.4%) - Respiratory insufficiency 1 (0.4%)   Context of lung cancer   - Cancer 5 (2.0%) - Lung carcinoma 2 (0.8%) - Rectal carcinoma 1 (0.4%) - Leiomyosarcoma 1 (0.4%) - Pancreas carcinoma 1 (0.4%) - Cardiovascular 4 (1.6%) - Angina Pectoris 1 (0.4%) - Palpitations/ atrial tachycardia 1 (0.4%) - Heart failure 1 (0.4%) - Diastolic dysfunction/congestive 1 (0.4%)   disease   - Scleroderma renal crisis 2 (0.8%) - Anaphylactic reactions 2 (0.8%) - Depression/suicide attempt 1 (0.4%) - Agranulocytosis 1 (0.4%) - Serum sickness 1 (0.4%) |

Values are number of patients (%); *some patients had several side effects; ** retrosternal pain was probably caused by known pleuropericarditis; ***severe infection required hospitalization. PAH: pulmonary arterial hypertension

**Supplementary TABLE IV: Characteristics of SSc-patients with and without follow-up in EUSTAR database**

|  | Not followed n=4664 | Followed n=9575 | p |
| --- | --- | --- | --- |
| Sex (Female) | 3961 (84.9%) | 8256 (86.2%) | 0.040 |
| Age, Mean ± SD | 55.9 ± 14.5 | 54.5 ± 13.8 | <0.0001 |
| Diffuse cutaneous form | 1394 (30.6%) | 2866 (30.2%) | 0.63 |
| Disease duration (years),  Median (Q1-Q3) | 5.7 [2.1-12] | 5.2 [2-11.1] | 0.0002 |
| ANA | 4088 (92.4%) | 8813 (94.5%) | <0.0001 |
| Anti-Scl70 | 1315 (31.3%) | 2994 (33.4%) | 0.021 |
| ACA | 1539 (36.6%) | 3410 (38.1%) | 0.10 |
| RNA pol III antibodies | 145 (5.2%) | 145 (5.2%) | 0.31 |
| Modified Rodnan skin score, Median (Q1-Q3) | 6 [2-13] | 7 [3-13] | <0.0001 |
| Lung fibrosis | 748 (44.2%) | 1505 (41.4%) | 0.062 |
| FVC, Mean ± SD | 92.6 ± 21.8 | 95.2 ± 21.4 | <0.0001 |
| DLCO, Mean ± SD | 69.9 ± 31 | 70.7 ± 23 | <0.0001 |
| Tender joints count, Median (Q1-Q3) | 0 [0-0] | 0 [0-0] | 0.25 |
| Swollen joints count, Median (Q1-Q3) | 0 [0-0] | 0 [0-0] | 0.22 |
| CRP, Median (Q1-Q3) | 2.7 [1-6.2] | 2.4 [1-6] | 0.20 |
| Previous IS or biologics | 840 (18%) | 1698 (17.7%) | 0.70 |
| Prednisone (mg/d ), Median (Q1-Q3) | 0 [0-5] | 0 [0-5] | 0.49 |

SSc: systemic sclerosis. Values are median [interquartile range] or mean ± SD or numbers (%) of observations. ANA: antinuclear antibodies; ACA: anticentromeres; RNA pol III: RNA polymerases III antibodies; lung fibrosis was diagnosed on high-resolution computed tomography; CT: computed tomography, FVC: forced vital capacity; DLCO: diffusing capacity of lung for carbon monoxide. Previous IS (immunosuppressive drugs) include Methotrexate, Mycophenolate Mofetil, Azathioprin and Cyclophosphamide, whereas biologics include anti-TNF alpha, Tocilizumab and Abatacept.

**Supplementary TABLE V: Effect of rheumatoid factor, anti-CCP positivity and smoking status on skin and lung in the rituximab-treated patients**

|  | Rodnan | | FVC | | DLCO | |
| --- | --- | --- | --- | --- | --- | --- |
|  | OR  [95CI%] | p | OR  [95CI%] | p | OR  [95CI%] | p |
| AntiCCP (22/210) | 0.96 [0.07-12.94] | 0.98 | 3.16 [0.85-11.76] | 0.089 | 1.45 [0.16-13.13] | 0.74 |
| RF (48/233) | 0.69 [0.13-3.64] | 0.66 | 1.93 [0.63-5.86] | 0.25 | 1.04 [0.2-5.44] | 0.97 |
| Smoking (past or current) (86/226) | 1.18 [0.48-2.87] | 0.72 | 1.25 [0.44-3.61] | 0.68 | 2.39 [0.51-11.14] | 0.27 |
| Current smoker  (27/226) | 0.67 [0.23-1.99] | 0.48 | 1.33 [0.36-4.91] | 0.67 | 0.68 [0.07-6.71] | 0.74 |

 FVC: forced vital capacity; DLCO: diffusing capacity of lung for carbon monoxide. RF: rheumatoid factor; number are cases/number of data available.

**Supplementary TABLE VI: Effect of rituximab on skin involvement according to cumulative dosage**

|  | Cumulative dosage | | | |
| --- | --- | --- | --- | --- |
|  | ≤ 4000 | | > 4000 | |
|  | OR [IC95%] | p | OR [IC95%] | p |
| Modified Rodnan skin score | 1.74 [0.78-3.9] | 0.18 | 6.12 [1.83-20.46] | 0.003 |

Results of matching with a ratio 1:4 are presented.

**LEGEND OF SUPPLEMENTARY FIGURES**

**Supplementary Figure 1: flow-chart for patients treated with rituximab and controls from EUSTAR database.**

MS: musculoskeletal. 12 other indication: 4 vasculitis, 1 malt NH lymphoma, 1 cardiac involvement + mantle cell lymphoma, 1 upper gastrointestinal involvement, 1 cardiac involvement, 4 data not provided.

**Supplementary Figure 2: Ajusted OR for skin fibrosis improvement and lung fibrosis worsening among propensity score-matched patients treated or untreated with rituximab in subgroup analyses**.

The analyses of decrease in the modified Rodnan score of 5 points and 25% and decrease in the FVC of 10% were based on propensity score matching with a ratio 1:4. For each complete imputed data set, propensity score was estimated and association between decrease in the modified Rodnan score/in FVC and treatment was evaluated using conditional logistic regression. We used other matching method with ratio 1:1 within a caliper of 0.05 standard deviation of the logistic propensity score, stratification on the quintiles of the propensity score, and inverse probability of treatment weighting (IPTW). Decrease in the modified Rodnan score of 5 points and 25% in patients with (A) early disease (disease duration ≤ 5 years) (B) diffuse cutaneous form (C) Decrease in the FVC of 10% in patients with early disease (disease duration ≤ 5 years) and in patients with diffuse cutaneous form (D).

**Supplementary Figure 3: Ajusted OR for decrease in FVC and decrease in steroids use among propensity score-matched patients treated or untreated with rituximab**

The analyses of decrease in the FVC (A) and stopping or tapering steroids (B) were based on propensity score matching with a ratio 1:4. For each complete imputed data set, propensity score was estimated and association between decrease in the FVC/ stopping or tapering steroids respectively was evaluated using conditional logistic regression. We used other matching method with ratio 1:1 within a caliper of 0.05 standard deviation of the logistic propensity score, stratification on the quintiles of the propensity score, and inverse probability of treatment weighting (IPTW).
